# Supplementary material
Source: publisher figshare collection journal article supplement (https://frontiersin.figshare.com/ndownloader/files/31683650)

Original images of Western blotting for Figure 4B.

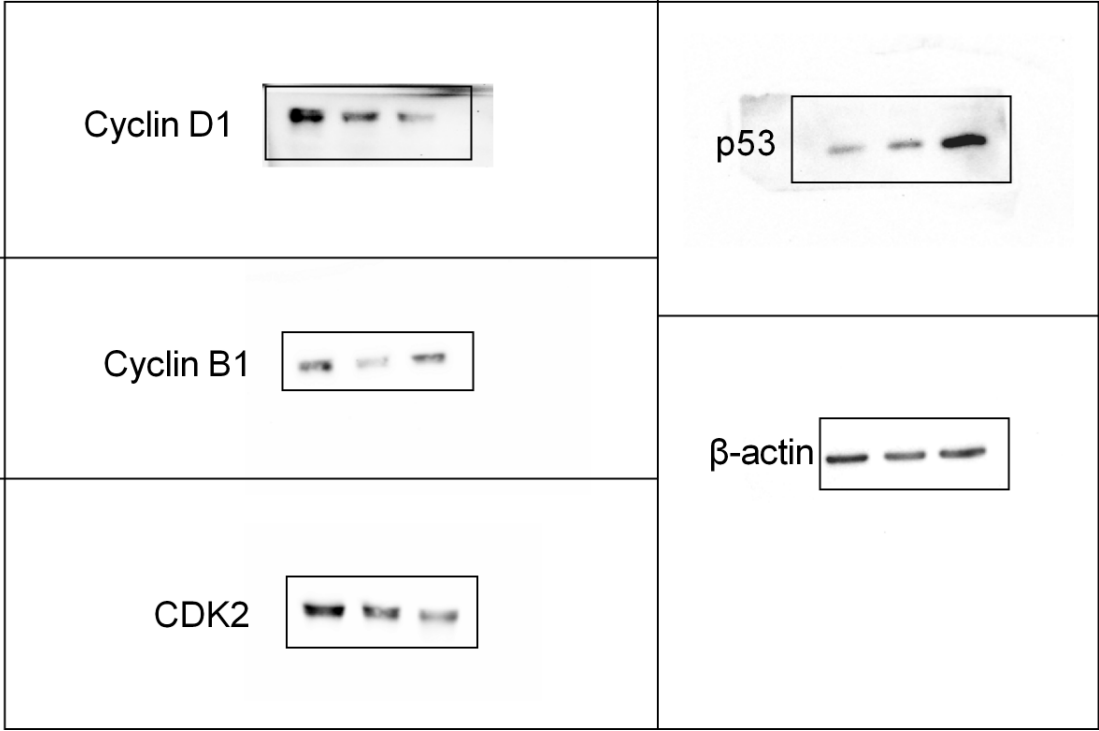

Original images of Western blotting for Figure 7.

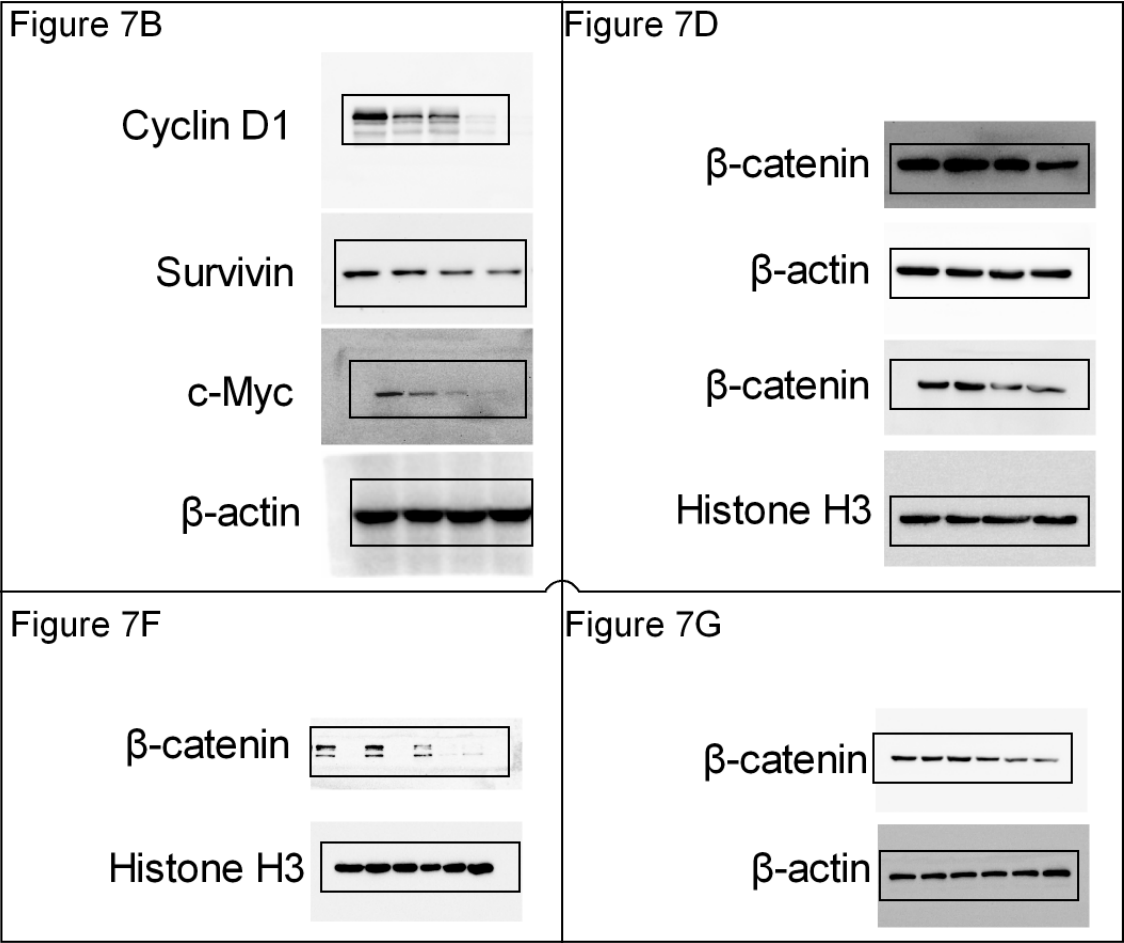

Supplement: Supplementary file [file 31683650]
